# Supplementary material for: Intersections between heritage, multilingualism, and education: language acquisition in India
Source: Frontiers journal article supplement (doi:10.3389/fnhum.2025.1538482), 2025-10-21
Supplement: Data_Sheet_3.pdf [file Data_Sheet_3.pdf]

**STATEMENT - 5**

| S.No. | Language     | COMPARATIVE SPEAKERS'STRENGTH OF SCHEDULED LANGUAGES - 1971, 1981, 1991,2001 AND 2011 |                     |                     |                       |                       |                                |              |              |              |              |
|-------|--------------|---------------------------------------------------------------------------------------|---------------------|---------------------|-----------------------|-----------------------|--------------------------------|--------------|--------------|--------------|--------------|
|       |              | Persons who returned the language as their mother tongue                              |                     |                     |                       |                       | Percentage to total population |              |              |              |              |
|       |              | 1971                                                                                  | 1981                | 1991                | 2001                  | 2011                  | 1971                           | 1981         | 1991         | 2001         | 2011         |
| 1     | 2            | 3                                                                                     | 4                   | 5                   | 6                     | 7                     | 8                              | 9            | 10           | 11           | 12           |
|       | <b>India</b> | <b>54,81,59,652</b>                                                                   | <b>66,52,87,849</b> | <b>83,85,83,988</b> | <b>1,02,86,10,328</b> | <b>1,21,08,54,977</b> | <b>97.14</b>                   | <b>89.23</b> | <b>97.05</b> | <b>96.56</b> | <b>96.71</b> |
| 1     | Hindi*       | 20,27,67,971                                                                          | 25,77,49,009        | 32,95,18,087        | 42,20,48,642          | 52,83,47,193          | 36.99                          | 38.74        | 39.29        | 41.03        | 43.63        |
| 2     | Bengali      | 4,47,92,312                                                                           | 5,12,98,319         | 6,95,95,738         | 8,33,69,769           | 9,72,37,669           | 8.17                           | 7.71         | 8.30         | 8.11         | 8.03         |
| 3     | Marathi      | 4,17,65,190                                                                           | 4,94,52,922         | 6,24,81,681         | 7,19,36,894           | 8,30,26,680           | 7.62                           | 7.43         | 7.45         | 6.99         | 6.86         |
| 4     | Telugu       | 4,47,56,923                                                                           | 5,06,24,611         | 6,60,17,615         | 7,40,02,856           | 8,11,27,740           | 8.16                           | 7.61         | 7.87         | 7.19         | 6.70         |
| 5     | Tamil        | 3,76,90,106                                                                           | **                  | 5,30,06,368         | 6,07,93,814           | 6,90,26,881           | 6.88                           | **           | 6.32         | 5.91         | 5.70         |
| 6     | Gujarati     | 2,58,65,012                                                                           | 3,30,63,267         | 4,06,73,814         | 4,60,91,617           | 5,54,92,554           | 4.72                           | 4.97         | 4.85         | 4.48         | 4.58         |
| 7     | Urdu         | 2,86,20,895                                                                           | 3,49,41,435         | 4,34,06,932         | 5,15,36,111           | 5,07,72,631           | 5.22                           | 5.25         | 5.18         | 5.01         | 4.19         |
| 8     | Kannada      | 2,17,10,649                                                                           | 2,56,97,146         | 3,27,53,676         | 3,79,24,011           | 4,37,06,512           | 3.96                           | 3.86         | 3.91         | 3.69         | 3.61         |
| 9     | Odia         | 1,98,63,198                                                                           | 2,30,21,528         | 2,80,61,313         | 3,30,17,446           | 3,75,21,324           | 3.62                           | 3.46         | 3.35         | 3.21         | 3.10         |
| 10    | Malayalam    | 2,19,38,760                                                                           | 2,57,00,705         | 3,03,77,176         | 3,30,66,392           | 3,48,38,819           | 4.00                           | 3.86         | 3.62         | 3.21         | 2.88         |
| 11    | Punjabi      | 1,41,08,443                                                                           | 1,96,11,199         | 2,33,78,744         | 2,91,02,477           | 3,31,24,726           | 2.57                           | 2.95         | 2.79         | 2.83         | 2.74         |
| 12    | Assamese     | 89,59,558                                                                             | **                  | 1,30,79,696         | 1,31,68,484           | 1,53,11,351           | 1.63                           | **           | 1.56         | 1.28         | 1.26         |
| 13    | Maithili     | 61,30,026                                                                             | 75,22,265           | 77,66,921           | 1,21,79,122           | 1,35,83,464           | 1.12                           | 1.13         | 0.93         | 1.18         | 1.12         |
| 14    | Santali      | 37,86,899                                                                             | 43,32,511           | 52,16,325           | 64,69,600             | 73,68,192             | 0.69                           | 0.65         | 0.62         | 0.63         | 0.61         |
| 15    | Kashmiri     | 24,95,487                                                                             | 31,76,975           | #                   | 55,27,698             | 67,97,587             | 0.46                           | 0.48         | #            | 0.54         | 0.56         |
| 16    | Nepali       | 14,19,835                                                                             | 13,60,636           | 20,76,645           | 28,71,749             | 29,26,168             | 0.26                           | 0.20         | 0.25         | 0.28         | 0.24         |
| 17    | Sindhi       | 16,76,875                                                                             | 20,44,389           | 21,22,848           | 25,35,485             | 27,72,264             | 0.31                           | 0.31         | 0.25         | 0.25         | 0.23         |
| 18    | Dogri        | 12,99,143                                                                             | 15,30,616           | #                   | 22,82,589             | 25,96,767             | 0.24                           | 0.23         | #            | 0.22         | 0.21         |
| 19    | Konkani      | 15,08,432                                                                             | 15,70,108           | 17,60,607           | 24,89,015             | 22,56,502             | 0.28                           | 0.24         | 0.21         | 0.24         | 0.19         |
| 20    | Manipuri \$  | 7,91,714                                                                              | 9,01,407            | 12,70,216           | 14,66,705             | 17,61,079             | 0.14                           | 0.14         | 0.15         | 0.14         | 0.15         |
| 21    | Bodo         | 5,56,576                                                                              | **                  | 12,21,881           | 13,50,478             | 14,82,929             | 0.10                           | **           | 0.15         | 0.13         | 0.12         |
| 22    | Sanskrit     | 2,212                                                                                 | 6,106               | 49,736              | 14,135                | 24,821                | N                              | N            | 0.01         | N            | N            |

**Note:**

1. The percentage of speakers of each language for 1981 has been worked out on the total population of India excluding the population of Assam where the 1981 Census was not conducted due to disturbed conditions
  2. Full figures for Tamil, Assam and Bodo for 1981 are not available as the census records for Tamil Nadu were lost due to floods and the 1981 Census could not be conducted in Assam due to the disturbed conditions then prevailing there. Therefore, percentage to total population of Tamil and Assamese are not given.
  3. The percentage of speakers of each language for 1991 has been worked out on the total population of India excluding the population of Jammu & Kashmir where the 1991 Census was not conducted due to disturbed conditions.
  4. The percentage of speakers of each language for 2001 has been worked out on the population of India excluding the population of Mao-Maram, Paomata and Purul subdivisions of Senapati district of Manipur due to cancellation of census results over there.
- # Full figures for Kashmiri & Dogri language for 1991 are not available as the 1991 Census was not conducted in Jammu & Kashmir due to disturbed conditions.
- \$ Excludes figures of Paomata, Mao-Maram and Purul sub-divisions of Senapati district of Manipur for 2001.
- N' - Stands for Negligible.
- @ Maithili figure has been extracted from Hindi language from 1971 census to 1991 census since it was one of the mother tongues grouped under Hindi during the period.
